# Supplementary material for: Cyclic Water Clusters in Tape-Like and Cage-Like Structures
Source: Molecules. 2011 Apr 4;16(4):2871–83. doi: 10.3390/molecules16042871 (PMC6260625; doi:10.3390/molecules16042871)

# checkCIF/PLATON report

Structure factors have been supplied for datablock(s) I

No syntax errors found.      CIF dictionary      Interpreting this report

## Datablock: I

---

Bond precision:    C-C = 0.0074 Å                      Wavelength=0.71073

Cell:                      a=22.979(4)              b=13.656(3)              c=24.890(6)  
                            alpha=90              beta=115.235(2)              gamma=90

Temperature:              293 K

|                | Calculated                                         | Reported               |
|----------------|----------------------------------------------------|------------------------|
| Volume         | 7065(3)                                            | 7065(3)                |
| Space group    | C 2/c                                              | C2/c                   |
| Hall group     | -C 2yc                                             | ?                      |
| Moiety formula | 2(C30 H24 Co N6), 2(O4 S),<br>H6 O3, 12(H2 O), H O | ?                      |
| Sum formula    | C60 H79 Co2 N12 O24 S2                             | C60 H79 Co2 N12 O24 S2 |
| Mr             | 1534.35                                            | 1534.33                |
| Dx,g cm-3      | 1.442                                              | 1.442                  |
| Z              | 4                                                  | 4                      |
| Mu (mm-1)      | 0.614                                              | 0.614                  |
| F000           | 3204.0                                             | 3204.0                 |
| F000'          | 3209.30                                            |                        |
| h,k,lmax       | 27,16,29                                           | 27,16,29               |
| Nref           | 6229                                               | 6202                   |
| Tmin,Tmax      | 0.874,0.884                                        | 0.877,0.887            |
| Tmin'          | 0.874                                              |                        |

Correction method= MULTI-SCAN

Data completeness= 0.996                      Theta(max)= 25.010

R(reflections)= 0.0607( 5110)              wR2(reflections)= 0.1886( 6202)

S = 1.012                      Npar= 457

---

The following ALERTS were generated. Each ALERT has the format  
**test-name\_ALERT\_alert-type\_alert-level.**  
Click on the hyperlinks for more details of the test.

---

### Alert level B

|                                        |      |    |      |    |           |
|----------------------------------------|------|----|------|----|-----------|
| PLAT417_ALERT_2_B Short Inter D-H..H-D | H5C  | .. | H9D  | .. | 2.09 Ang. |
| PLAT417_ALERT_2_B Short Inter D-H..H-D | H6C  | .. | H10D | .. | 2.08 Ang. |
| PLAT417_ALERT_2_B Short Inter D-H..H-D | H11A | .. | H13C | .. | 1.90 Ang. |

### Alert level C

|                   |                                                  |                    |                              |                             |     |      |      |
|-------------------|--------------------------------------------------|--------------------|------------------------------|-----------------------------|-----|------|------|
| PLAT232_ALERT_2_C | Hirshfeld Test Diff (M-X)                        | Co1                | --                           | N1                          | ..  | 7.72 | su   |
| PLAT232_ALERT_2_C | Hirshfeld Test Diff (M-X)                        | Co1                | --                           | N3                          | ..  | 6.86 | su   |
| PLAT232_ALERT_2_C | Hirshfeld Test Diff (M-X)                        | Co1                | --                           | N4                          | ..  | 6.98 | su   |
| PLAT232_ALERT_2_C | Hirshfeld Test Diff (M-X)                        | Co1                | --                           | N5                          | ..  | 6.11 | su   |
| PLAT232_ALERT_2_C | Hirshfeld Test Diff (M-X)                        | Co1                | --                           | N6                          | ..  | 6.46 | su   |
| PLAT242_ALERT_2_C | Check Low                                        | Ueq                | as Compared to Neighbors for |                             | Co1 |      |      |
| PLAT303_ALERT_2_C | Full Occupancy H-Atom                            | H7D                | with # Connections           |                             |     | 2    |      |
| PLAT341_ALERT_3_C | Low Bond Precision on                            | C-C Bonds (x 1000) | Ang                          | ..                          |     | 7    |      |
| PLAT417_ALERT_2_C | Short Inter D-H..H-D                             | H5D                | ..                           | H11C                        | ..  | 2.13 | Ang. |
| PLAT911_ALERT_3_C | Missing # FCF Refl Between THmin & STh/L=        | 0.595              |                              |                             |     | 27   |      |
| PLAT918_ALERT_3_C | Reflection(s) # with I(obs) much smaller I(calc) |                    |                              |                             |     | 1    |      |
| PLAT048_ALERT_1_C | MoietyFormula Not Given .....                    |                    |                              |                             |     | ?    |      |
| PLAT125_ALERT_4_C | No '_symmetry_space_group_name_Hall' Given ..... |                    |                              |                             |     | ?    |      |
| PLAT244_ALERT_4_C | Low                                              | 'Solvent'          | Ueq                          | as Compared to Neighbors of |     | S1   |      |

### Alert level G

|                   |                                                  |       |       |
|-------------------|--------------------------------------------------|-------|-------|
| PLAT072_ALERT_2_G | SHELXL First Parameter in WGHT Unusually Large.  | 0.11  |       |
| PLAT083_ALERT_2_G | SHELXL Second Parameter in WGHT Unusually Large. | 19.58 |       |
| PLAT199_ALERT_1_G | Check the Reported _cell_measurement_temperature | 293   | K     |
| PLAT200_ALERT_1_G | Check the Reported _diffrn_ambient_temperature   | 293   | K     |
| PLAT302_ALERT_4_G | Note: Anion/Solvent Disorder .....               | 4.00  | Perc. |

- 
- 0 **ALERT level A** = In general: serious problem  
 4 **ALERT level B** = Potentially serious problem  
 14 **ALERT level C** = Check and explain  
 5 **ALERT level G** = General alerts; check
- 3 ALERT type 1 CIF construction/syntax error, inconsistent or missing data  
 14 ALERT type 2 Indicator that the structure model may be wrong or deficient  
 3 ALERT type 3 Indicator that the structure quality may be low  
 3 ALERT type 4 Improvement, methodology, query or suggestion  
 0 ALERT type 5 Informative message, check
- 

## checkCIF publication errors

### Alert level A

PUBL004\_ALERT\_1\_A The contact author's name and address are missing,  
                   \_publ\_contact\_author\_name and \_publ\_contact\_author\_address.  
 PUBL005\_ALERT\_1\_A \_publ\_contact\_author\_email, \_publ\_contact\_author\_fax and  
                   \_publ\_contact\_author\_phone are all missing.  
                   At least one of these should be present.  
 PUBL006\_ALERT\_1\_A \_publ\_requested\_journal is missing  
                   e.g. 'Acta Crystallographica Section C'  
 PUBL008\_ALERT\_1\_A \_publ\_section\_title is missing. Title of paper.  
 PUBL009\_ALERT\_1\_A \_publ\_author\_name is missing. List of author(s) name(s).  
 PUBL010\_ALERT\_1\_A \_publ\_author\_address is missing. Author(s) address(es).  
 PUBL012\_ALERT\_1\_A \_publ\_section\_abstract is missing.  
                   Abstract of paper in English.

### Alert level G

PUBL013\_ALERT\_1\_G The \_publ\_section\_comment (discussion of study) is missing. This is required for a full paper submission (but is optional for an electronic paper).

PUBL017\_ALERT\_1\_G The \_publ\_section\_references section is missing or empty.

---

7 **ALERT level A** = Data missing that is essential or data in wrong format  
2 **ALERT level G** = General alerts. Data that may be required is missing

---

## Publication of your CIF

**You should always attempt to resolve as many as possible of the alerts in all categories. Often the minor alerts point to easily fixed oversights, errors and omissions in your CIF or refinement strategy, so attention to these fine details can be worthwhile. In order to resolve some of the more serious problems it may be necessary to carry out additional measurements or structure refinements. However, the nature of your study may justify the reported deviations from the submission requirements of the journal and these should be commented upon in the discussion or experimental section of a paper - after all, they might represent an interesting feature.**

**If level A alerts remain, which you believe to be justified deviations, and you intend to submit this CIF for publication in Acta Crystallographica Section C or Section E, you should additionally insert an explanation in your CIF using the Validation Reply Form (VRF) below. Your explanation will be considered as part of the review process.**

**If you intend to submit to another section of Acta Crystallographica or Journal of Applied Crystallography or Journal of Synchrotron Radiation, you should make sure that at least a basic structural check is run on the final version of your CIF prior to submission.**

```
# start Validation Reply Form
_vrf_PUBL004_GLOBAL
;
PROBLEM: The contact author's name and address are missing,
RESPONSE: ...
;
_vrf_PUBL005_GLOBAL
;
PROBLEM: _publ_contact_author_email, _publ_contact_author_fax and
RESPONSE: ...
;
_vrf_PUBL006_GLOBAL
;
PROBLEM: _publ_requested_journal is missing
RESPONSE: ...
;
_vrf_PUBL008_GLOBAL
;
PROBLEM: _publ_section_title is missing. Title of paper.
RESPONSE: ...
;
_vrf_PUBL009_GLOBAL
;
PROBLEM: _publ_author_name is missing. List of author(s) name(s).
RESPONSE: ...
;
```

```

_vrf_PUBL010_GLOBAL
;
PROBLEM: _publ_author_address is missing. Author(s) address(es).
RESPONSE: ...
;
_vrf_PUBL012_GLOBAL
;
PROBLEM: _publ_section_abstract is missing.
RESPONSE: ...
;
# end Validation Reply Form

```

**If you wish to submit your CIF for publication in Acta Crystallographica Section C or E, you should upload your CIF via the web. If your CIF is to form part of a submission to another IUCr journal, you will be asked, either during electronic submission or by the Co-editor handling your paper, to upload your CIF via our web site.**

---

**PLATON version of 22/10/2010; check.def file version of 11/10/2010**

Datablock I - ellipsoid plot

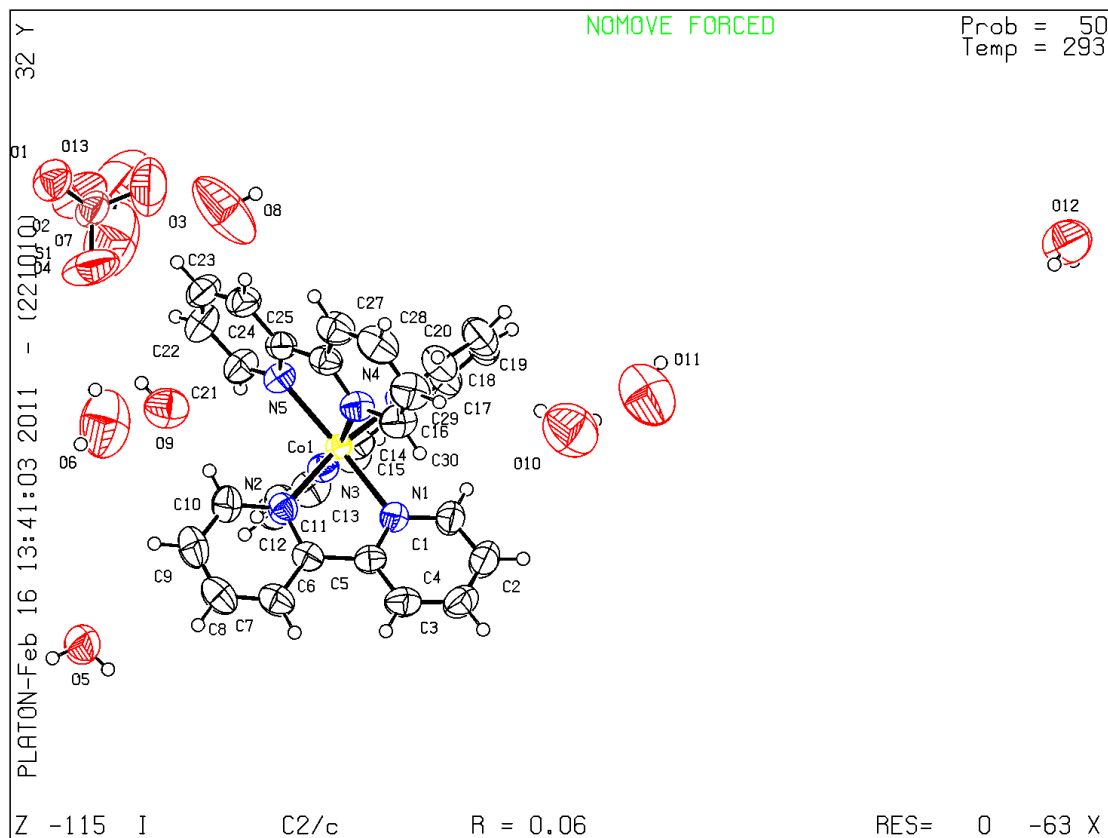

# checkCIF/PLATON report

Structure factors have been supplied for datablock(s) I

No syntax errors found.      CIF dictionary      Interpreting this report

## Datablock: I

---

Bond precision:    C-C = 0.0112 Å                      Wavelength=0.71073

Cell:                      a=12.551(5)              b=23.483(9)              c=42.330(17)  
                            alpha=90              beta=95.053(6)              gamma=90

Temperature:            296 K

|                | Calculated                                  | Reported           |
|----------------|---------------------------------------------|--------------------|
| Volume         | 12428(8)                                    | 12428(9)           |
| Space group    | C 2/c                                       | C2/c               |
| Hall group     | -C 2yc                                      | ?                  |
| Moiety formula | C49 H35 Cu2 N8 O6, 0.5(C10 H8 N2), 15(H2 O) | ?                  |
| Sum formula    | C54 H69 Cu2 N9 O21                          | C54 H69 Cu2 N9 O21 |
| Mr             | 1307.28                                     | 1307.26            |
| Dx,g cm-3      | 1.397                                       | 1.397              |
| Z              | 8                                           | 8                  |
| Mu (mm-1)      | 0.765                                       | 0.765              |
| F000           | 5456.0                                      | 5456.0             |
| F000'          | 5463.72                                     |                    |
| h,k,lmax       | 14,27,50                                    | 14,27,50           |
| Nref           | 10950                                       | 10937              |
| Tmin,Tmax      | 0.777,0.795                                 | 0.786,0.803        |
| Tmin'          | 0.777                                       |                    |

Correction method= MULTI-SCAN

Data completeness= 0.999                      Theta(max)= 25.010

R(reflections)= 0.0821( 7147)              wR2(reflections)= 0.2538( 10937)

S = 1.027                      Npar= 775

---

The following ALERTS were generated. Each ALERT has the format  
**test-name\_ALERT\_alert-type\_alert-level.**  
Click on the hyperlinks for more details of the test.

---

### Alert level B

|                                        |      |    |      |    |           |
|----------------------------------------|------|----|------|----|-----------|
| PLAT415_ALERT_2_B Short Inter D-H..H-X | H13B | .. | H38  | .. | 2.07 Ang. |
| PLAT415_ALERT_2_B Short Inter D-H..H-X | H18B | .. | H40  | .. | 2.04 Ang. |
| PLAT417_ALERT_2_B Short Inter D-H..H-D | H8B  | .. | H15A | .. | 2.07 Ang. |

|                   |                      |      |    |      |     |      |      |
|-------------------|----------------------|------|----|------|-----|------|------|
| PLAT417_ALERT_2_B | Short Inter D-H..H-D | H18A | .. | H19A | ..  | 1.88 | Ang. |
| PLAT417_ALERT_2_B | Short Inter D-H..H-D | H18A | .. | H19B | ..  | 2.05 | Ang. |
| PLAT420_ALERT_2_B | D-H Without Acceptor | O13  | -  | H13B | ... | ?    |      |
| PLAT420_ALERT_2_B | D-H Without Acceptor | O18  | -  | H18B | ... | ?    |      |
| PLAT420_ALERT_2_B | D-H Without Acceptor | O19  | -  | H19A | ... | ?    |      |
| PLAT420_ALERT_2_B | D-H Without Acceptor | O19  | -  | H19B | ... | ?    |      |

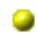

### Alert level C

RFACR01\_ALERT\_3\_C The value of the weighted R factor is > 0.25  
 Weighted R factor given 0.254

|                   |                                                  |                                  |           |
|-------------------|--------------------------------------------------|----------------------------------|-----------|
| PLAT241_ALERT_2_C | Check High                                       | Ueq as Compared to Neighbors for | N9        |
| PLAT242_ALERT_2_C | Check Low                                        | Ueq as Compared to Neighbors for | C50       |
| PLAT341_ALERT_3_C | Low Bond Precision on                            | C-C Bonds (x 1000) Ang ..        | 11        |
| PLAT911_ALERT_3_C | Missing # FCF Refl Between THmin & STh/L=        | 0.595                            | 13        |
| PLAT918_ALERT_3_C | Reflection(s) # with I(obs) much smaller I(calc) |                                  | 1         |
| PLAT048_ALERT_1_C | MoietyFormula Not Given .....                    |                                  | ?         |
| PLAT125_ALERT_4_C | No '_symmetry_space_group_name_Hall' Given ..... |                                  | ?         |
| PLAT234_ALERT_4_C | Large Hirshfeld Difference N9                    | -- C50 ..                        | 0.18 Ang. |

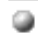

### Alert level G

|                   |                                                  |       |
|-------------------|--------------------------------------------------|-------|
| PLAT072_ALERT_2_G | SHELXL First Parameter in WGHT Unusually Large.  | 0.12  |
| PLAT083_ALERT_2_G | SHELXL Second Parameter in WGHT Unusually Large. | 58.87 |
| PLAT710_ALERT_4_G | Delete 1-2-3 or 2-3-4 Linear Torsion Angle ... # | 9     |
|                   | N3 -CU2 -N2 -C10 -99.00 4.00 1.555 1.555 1.555   | 1.555 |
| PLAT710_ALERT_4_G | Delete 1-2-3 or 2-3-4 Linear Torsion Angle ... # | 13    |
|                   | N3 -CU2 -N2 -C6 82.00 4.00 1.555 1.555 1.555     | 1.555 |
| PLAT710_ALERT_4_G | Delete 1-2-3 or 2-3-4 Linear Torsion Angle ... # | 17    |
|                   | N2 -CU2 -N3 -C11 -141.00 4.00 1.555 1.555 1.555  | 1.555 |
| PLAT710_ALERT_4_G | Delete 1-2-3 or 2-3-4 Linear Torsion Angle ... # | 21    |
|                   | N2 -CU2 -N3 -C15 39.00 4.00 1.555 1.555 1.555    | 1.555 |
| PLAT710_ALERT_4_G | Delete 1-2-3 or 2-3-4 Linear Torsion Angle ... # | 33    |
|                   | N7 -CU1 -N5 -C25 -14.00 5.00 1.555 1.555 1.555   | 1.555 |
| PLAT710_ALERT_4_G | Delete 1-2-3 or 2-3-4 Linear Torsion Angle ... # | 37    |
|                   | N7 -CU1 -N5 -C21 170.00 4.00 1.555 1.555 1.555   | 1.555 |
| PLAT710_ALERT_4_G | Delete 1-2-3 or 2-3-4 Linear Torsion Angle ... # | 49    |
|                   | N5 -CU1 -N7 -C35 -112.00 5.00 1.555 1.555 1.555  | 1.555 |
| PLAT710_ALERT_4_G | Delete 1-2-3 or 2-3-4 Linear Torsion Angle ... # | 53    |
|                   | N5 -CU1 -N7 -C31 67.00 5.00 1.555 1.555 1.555    | 1.555 |
| PLAT794_ALERT_5_G | Note: Tentative Bond Valency for Cu1 .....       | 2.31  |
| PLAT794_ALERT_5_G | Note: Tentative Bond Valency for Cu2 .....       | 2.30  |

0 **ALERT level A** = In general: serious problem  
 9 **ALERT level B** = Potentially serious problem  
 9 **ALERT level C** = Check and explain  
 12 **ALERT level G** = General alerts; check

1 ALERT type 1 CIF construction/syntax error, inconsistent or missing data  
 13 ALERT type 2 Indicator that the structure model may be wrong or deficient  
 4 ALERT type 3 Indicator that the structure quality may be low  
 10 ALERT type 4 Improvement, methodology, query or suggestion  
 2 ALERT type 5 Informative message, check

## checkCIF publication errors

---

### Alert level A

PUBL004\_ALERT\_1\_A The contact author's name and address are missing,  
\_publ\_contact\_author\_name and \_publ\_contact\_author\_address.  
PUBL005\_ALERT\_1\_A \_publ\_contact\_author\_email, \_publ\_contact\_author\_fax and  
\_publ\_contact\_author\_phone are all missing.  
At least one of these should be present.  
PUBL006\_ALERT\_1\_A \_publ\_requested\_journal is missing  
e.g. 'Acta Crystallographica Section C'  
PUBL008\_ALERT\_1\_A \_publ\_section\_title is missing. Title of paper.  
PUBL009\_ALERT\_1\_A \_publ\_author\_name is missing. List of author(s) name(s).  
PUBL010\_ALERT\_1\_A \_publ\_author\_address is missing. Author(s) address(es).  
PUBL012\_ALERT\_1\_A \_publ\_section\_abstract is missing.  
Abstract of paper in English.

---

### Alert level G

PUBL013\_ALERT\_1\_G The \_publ\_section\_comment (discussion of study) is  
missing. This is required for a full paper submission (but is  
optional for an electronic paper).  
PUBL017\_ALERT\_1\_G The \_publ\_section\_references section is missing or  
empty.

---

7 **ALERT level A** = Data missing that is essential or data in wrong format  
2 **ALERT level G** = General alerts. Data that may be required is missing

---

## Publication of your CIF

**You should always attempt to resolve as many as possible of the alerts in all categories. Often the minor alerts point to easily fixed oversights, errors and omissions in your CIF or refinement strategy, so attention to these fine details can be worthwhile. In order to resolve some of the more serious problems it may be necessary to carry out additional measurements or structure refinements. However, the nature of your study may justify the reported deviations from the submission requirements of the journal and these should be commented upon in the discussion or experimental section of a paper - after all, they might represent an interesting feature.**

**If level A alerts remain, which you believe to be justified deviations, and you intend to submit this CIF for publication in Acta Crystallographica Section C or Section E, you should additionally insert an explanation in your CIF using the Validation Reply Form (VRF) below. Your explanation will be considered as part of the review process.**

**If you intend to submit to another section of Acta Crystallographica or Journal of Applied Crystallography or Journal of Synchrotron Radiation, you should make sure that at least a basic structural check is run on the final version of your CIF prior to submission.**

```
# start Validation Reply Form
_vrf_PUBL004_GLOBAL
;
PROBLEM: The contact author's name and address are missing,
RESPONSE: ...
;
_vrf_PUBL005_GLOBAL
;
```

```
PROBLEM: _publ_contact_author_email, _publ_contact_author_fax and
RESPONSE: ...
;
_vrf_PUBL006_GLOBAL
;
PROBLEM: _publ_requested_journal is missing
RESPONSE: ...
;
_vrf_PUBL008_GLOBAL
;
PROBLEM: _publ_section_title is missing. Title of paper.
RESPONSE: ...
;
_vrf_PUBL009_GLOBAL
;
PROBLEM: _publ_author_name is missing. List of author(s) name(s).
RESPONSE: ...
;
_vrf_PUBL010_GLOBAL
;
PROBLEM: _publ_author_address is missing. Author(s) address(es).
RESPONSE: ...
;
_vrf_PUBL012_GLOBAL
;
PROBLEM: _publ_section_abstract is missing.
RESPONSE: ...
;
# end Validation Reply Form
```

**If you wish to submit your CIF for publication in Acta Crystallographica Section C or E, you should upload your CIF via the web. If your CIF is to form part of a submission to another IUCr journal, you will be asked, either during electronic submission or by the Co-editor handling your paper, to upload your CIF via our web site.**

---

**PLATON version of 22/10/2010; check.def file version of 11/10/2010**

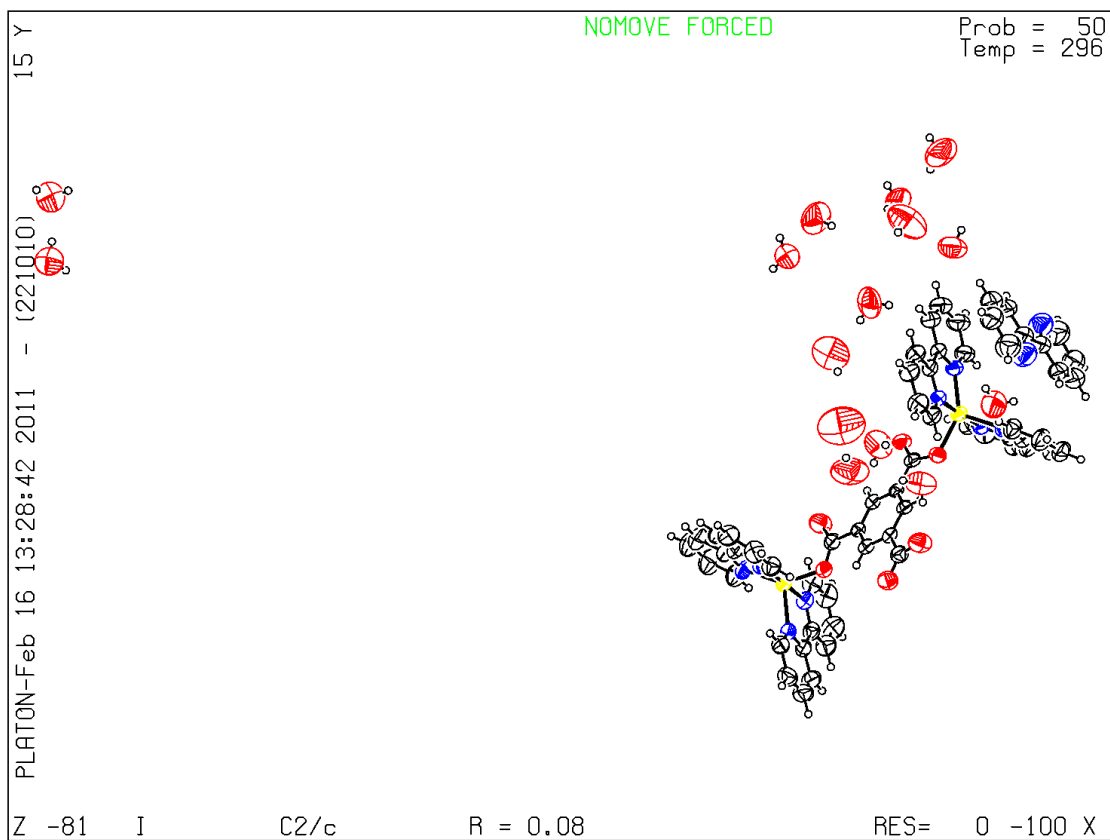

Supplement: Supplementary file 1 [file molecules-16-02871-s001.pdf]
